# Supplementary material for: Association of Dairy Product Consumption with Metabolic and Inflammatory Biomarkers in Adolescents: A Cross-Sectional Analysis from the LabMed Study
Source: PubMed Central journal article supplement (PMC6835390; doi:10.3390/nu11102268), 2019-09-21
Supplement: nutrients-11-02268-s001.pdf [file nutrients-11-02268-s001.pdf]

**Table S1.** Association of cheese intake with C-reactive protein and interleukin-6 concentrations.

| Tertiles of cheese intake | C-reactive protein   |                 |                      |                 | Interleukin-6        |                 |                      |                 |
|---------------------------|----------------------|-----------------|----------------------|-----------------|----------------------|-----------------|----------------------|-----------------|
|                           | Model 1              |                 | Model 2              |                 | Model 1              |                 | Model 2              |                 |
|                           | AMR (95% CI)         | <i>P</i> -value | AMR (95% CI)         | <i>P</i> -value | AMR (95% CI)         | <i>P</i> -value | AMR (95% CI)         | <i>P</i> -value |
| T1                        | Reference            |                 | Reference            |                 | Reference            |                 | Reference            |                 |
| T2                        | 1.26<br>(0.94; 1.71) | 0.124           | 1.10<br>(0.82; 1.48) | 0.510           | 0.99<br>(0.83; 1.18) | 0.898           | 1.02<br>(0.85; 1.23) | 0.801           |
| T3                        | 0.99<br>(0.71; 1.39) | 0.974           | 0.98<br>(0.70; 1.38) | 0.912           | 0.94<br>(0.78; 1.14) | 0.541           | 1.00<br>(0.81; 1.22) | 0.965           |

AMR, arithmetic mean ratio; T, tertile. Cheese: T1,  $\leq 4.3$  g/day; T2, 4.3–12.9 g/day; T3,  $\geq 12.9$  g/day. Model 1: Unadjusted model; Model 2: Adjusted for age, gender, weight status, pubertal stage A and B, total energy intake, mean adequacy ratio, socioeconomic status and cardiorespiratory fitness (VO<sub>2</sub>max).

**Table S2.** Association of total dairy product, milk, yogurt and cheese intake with adiponectin and leptin concentrations.

|                                                | Adiponectin          |                 |                      |                 | Leptin               |                 |                      |                 |
|------------------------------------------------|----------------------|-----------------|----------------------|-----------------|----------------------|-----------------|----------------------|-----------------|
|                                                | Model 1              |                 | Model 2              |                 | Model 1              |                 | Model 2              |                 |
|                                                | AMR<br>(95% CI)      | <i>P</i> -value | AMR<br>(95% CI)      | <i>P</i> -value | AMR<br>(95% CI)      | <i>P</i> -value | AMR<br>(95% CI)      | <i>P</i> -value |
| <b>Tertiles of total dairy products intake</b> |                      |                 |                      |                 |                      |                 |                      |                 |
| T1                                             | Reference            |                 | Reference            |                 | Reference            |                 | Reference            |                 |
| T2                                             | 1.00<br>(0.90; 1.11) | 0.985           | 1.03<br>(0.93; 1.13) | 0.555           | 0.92<br>(0.71; 1.20) | 0.555           | 1.00<br>(0.82; 1.22) | 0.972           |
| T3                                             | 0.96<br>(0.86; 1.07) | 0.449           | 0.96<br>(0.85; 1.08) | 0.467           | 0.93<br>(0.71; 1.21) | 0.586           | 1.03<br>(0.83; 1.27) | 0.813           |
| <b>Tertiles of milk intake</b>                 |                      |                 |                      |                 |                      |                 |                      |                 |
| T1                                             | Reference            |                 | Reference            |                 | Reference            |                 | Reference            |                 |
| T2                                             | 0.92<br>(0.82; 1.03) | 0.142           | 0.98<br>(0.88; 1.10) | 0.818           | 1.03<br>(0.86; 1.22) | 0.760           | 1.01<br>(0.83; 1.25) | 0.888           |
| T3                                             | 0.94<br>(0.84; 1.06) | 0.351           | 0.98<br>(0.86; 1.11) | 0.715           | 1.03<br>(0.86; 1.24) | 0.724           | 1.10<br>(0.88; 1.39) | 0.397           |
| <b>Tertiles of yogurt intake</b>               |                      |                 |                      |                 |                      |                 |                      |                 |
| T1                                             | Reference            |                 | Reference            |                 | Reference            |                 | Reference            |                 |
| T2                                             | 0.97<br>(0.88; 1.08) | 0.613           | 0.98<br>(0.89; 1.09) | 0.694           | 1.21<br>(0.95; 1.55) | 0.124           | 0.94<br>(0.79; 1.12) | 0.506           |
| T3                                             | 0.91<br>(0.78; 1.07) | 0.243           | 0.89<br>(0.76; 1.04) | 0.131           | 1.32<br>(0.90; 1.94) | 0.161           | 1.20<br>(0.90; 1.60) | 0.213           |
| <b>Tertiles of cheese intake</b>               |                      |                 |                      |                 |                      |                 |                      |                 |
| T1                                             | Reference            |                 | Reference            |                 | Reference            |                 | Reference            |                 |
| T2                                             | 0.95<br>(0.86; 1.05) | 0.333           | 0.98<br>(0.89; 1.08) | 0.685           | 0.83<br>(0.65; 1.08) | 0.165           | 0.95<br>(0.78; 1.14) | 0.569           |
| T3                                             | 0.97<br>(0.86; 1.09) | 0.590           | 1.00<br>(0.89; 1.13) | 0.943           | 0.94<br>(0.71; 1.25) | 0.656           | 0.98<br>(0.79; 1.23) | 0.885           |

Total dairy products: T1,  $\leq 266.1$  g/day; T2, 266.1–506.9 g/day; T3,  $\geq 506.9$  g/day; Milk: T1,  $\leq 192.5$  g/day; T2, 192.5–245.0 g/day; T3,  $\geq 245.0$  g/day; Yogurt: T1,  $\leq 53.6$  g/day; T2, 53.6–125.0 g/day; T3,  $\geq 125.0$  g/day; Cheese: T1,  $\leq 4.3$  g/day; T2, 4.3–12.9 g/day; T3,  $\geq 12.9$  g/day. Model 1: Unadjusted model; Model 2: Adjusted for age, gender, weight status, pubertal stage A and B, total energy intake, mean adequacy ratio, socioeconomic status and cardiorespiratory fitness (VO<sub>2</sub>max).
